# Supplementary material
Source: MDPI journal article supplement (https://www.mdpi.com/2073-4352/8/4/176)

# checkCIF/PLATON report

You have not supplied any structure factors. As a result the full set of tests cannot be run.

THIS REPORT IS FOR GUIDANCE ONLY. IF USED AS PART OF A REVIEW PROCEDURE FOR PUBLICATION, IT SHOULD NOT REPLACE THE EXPERTISE OF AN EXPERIENCED CRYSTALLOGRAPHIC REFEREE.

No syntax errors found.      CIF dictionary      Interpreting this report

## Datablock: d488

---

|                 |                                         |                                |
|-----------------|-----------------------------------------|--------------------------------|
| Bond precision: | C-C = 0.0068 A                          | Wavelength=1.54184             |
| Cell:           | a=19.2947(6)                            | b=15.1426(6)      c=20.4291(6) |
|                 | alpha=90                                | beta=103.384(3)      gamma=90  |
| Temperature:    | 293 K                                   |                                |
|                 | Calculated                              | Reported                       |
| Volume          | 5806.7(3)                               | 5806.7(3)                      |
| Space group     | C 2/c                                   | C 1 2/c 1                      |
| Hall group      | -C 2yc                                  | -C 2yc                         |
| Moiety formula  | C44 H54 N4 Ni3 O16, 2(H2 O) [+ solvent] | C44 H54 N4 Ni3 O16, 2(H2 O)    |
| Sum formula     | C44 H58 N4 Ni3 O18 [+ solvent]          | C44 H58 N4 Ni3 O18             |
| Mr              | 1107.01                                 | 1107.07                        |
| Dx, g cm-3      | 1.266                                   | 1.266                          |
| Z               | 4                                       | 0                              |
| Mu (mm-1)       | 1.683                                   | 1.683                          |
| F000            | 2312.0                                  | 2312.0                         |
| F000'           | 2282.78                                 |                                |
| h,k,lmax        | 23,18,24                                | 23,18,24                       |
| Nref            | 5465                                    | 5377                           |
| Tmin,Tmax       | 0.769,0.817                             | 0.958,1.000                    |
| Tmin'           | 0.714                                   |                                |

Correction method= # Reported T Limits: Tmin=0.958 Tmax=1.000  
AbsCorr = MULTI-SCAN

Data completeness= 0.984      Theta(max)= 69.648

R(reflections)= 0.0557( 4045)      wR2(reflections)= 0.1768( 5377)

S = 1.090      Npar= 338

---

The following ALERTS were generated. Each ALERT has the format

**test-name\_ALERT\_alert-type\_alert-level.**

Click on the hyperlinks for more details of the test.

### Alert level B

|                                        |    |       |              |
|----------------------------------------|----|-------|--------------|
| PLAT420_ALERT_2_B D-H Without Acceptor | 09 | --H9C | Please Check |
|----------------------------------------|----|-------|--------------|

### Alert level C

|                                                                      |         |        |
|----------------------------------------------------------------------|---------|--------|
| PLAT094_ALERT_2_C Ratio of Maximum / Minimum Residual Density ....   | 2.60    | Report |
| PLAT220_ALERT_2_C Non-Solvent Resd 1 C Ueq(max)/Ueq(min) Range       | 5.5     | Ratio  |
| PLAT222_ALERT_3_C Non-Solv. Resd 1 H Uiso(max)/Uiso(min) Range       | 6.1     | Ratio  |
| PLAT230_ALERT_2_C Hirshfeld Test Diff for O3 --C9 .                  | 5.7     | s.u.   |
| PLAT234_ALERT_4_C Large Hirshfeld Difference C21 --C22               | 0.24    | Ang.   |
| PLAT241_ALERT_2_C High 'MainMol' Ueq as Compared to Neighbors of C9  |         | Check  |
| PLAT241_ALERT_2_C High 'MainMol' Ueq as Compared to Neighbors of C22 |         | Check  |
| PLAT242_ALERT_2_C Low 'MainMol' Ueq as Compared to Neighbors of O6   |         | Check  |
| PLAT242_ALERT_2_C Low 'MainMol' Ueq as Compared to Neighbors of C18  |         | Check  |
| PLAT341_ALERT_3_C Low Bond Precision on C-C Bonds .....              | 0.00676 | Ang.   |
| PLAT360_ALERT_2_C Short C(sp3)-C(sp3) Bond C8 - C9 .                 | 1.34    | Ang.   |
| PLAT410_ALERT_2_C Short Intra H...H Contact H8B ..H9B                | 1.96    | Ang.   |
| PLAT412_ALERT_2_C Short Intra XH3 .. XHn H20A ..H21A                 | 1.86    | Ang.   |
| PLAT417_ALERT_2_C Short Inter D-H..H-D H6A ..H9D                     | 2.10    | Ang.   |

### Alert level G

|                                                                    |       |        |
|--------------------------------------------------------------------|-------|--------|
| PLAT002_ALERT_2_G Number of Distance or Angle Restraints on AtSite | 11    | Note   |
| PLAT003_ALERT_2_G Number of Uiso or Uij Restrained non-H Atoms ... | 3     | Report |
| PLAT007_ALERT_5_G Number of Unrefined Donor-H Atoms .....          | 1     | Report |
| PLAT072_ALERT_2_G SHELXL First Parameter in WGHT Unusually Large   | 0.11  | Report |
| PLAT172_ALERT_4_G The CIF-Embedded .res File Contains DFIX Records | 5     | Report |
| PLAT173_ALERT_4_G The CIF-Embedded .res File Contains DANG Records | 4     | Report |
| PLAT177_ALERT_4_G The CIF-Embedded .res File Contains DELU Records | 2     | Report |
| PLAT178_ALERT_4_G The CIF-Embedded .res File Contains SIMU Records | 2     | Report |
| PLAT186_ALERT_4_G The CIF-Embedded .res File Contains ISOR Records | 2     | Report |
| PLAT199_ALERT_1_G Reported _cell_measurement_temperature ..... (K) | 293   | Check  |
| PLAT200_ALERT_1_G Reported _diffrn_ambient_temperature ..... (K)   | 293   | Check  |
| PLAT230_ALERT_2_G Hirshfeld Test Diff for C21' --C22 .             | 8.6   | s.u.   |
| PLAT300_ALERT_4_G Atom Site Occupancy of C21 Constrained at        | 0.5   | Check  |
| PLAT300_ALERT_4_G Atom Site Occupancy of C21' Constrained at       | 0.5   | Check  |
| PLAT300_ALERT_4_G Atom Site Occupancy of H6A Constrained at        | 0.5   | Check  |
| PLAT300_ALERT_4_G Atom Site Occupancy of H6B Constrained at        | 0.5   | Check  |
| PLAT300_ALERT_4_G Atom Site Occupancy of H21A Constrained at       | 0.5   | Check  |
| PLAT300_ALERT_4_G Atom Site Occupancy of H21B Constrained at       | 0.5   | Check  |
| PLAT300_ALERT_4_G Atom Site Occupancy of H21C Constrained at       | 0.5   | Check  |
| PLAT300_ALERT_4_G Atom Site Occupancy of H21D Constrained at       | 0.5   | Check  |
| PLAT300_ALERT_4_G Atom Site Occupancy of H22A Constrained at       | 0.5   | Check  |
| PLAT300_ALERT_4_G Atom Site Occupancy of H22B Constrained at       | 0.5   | Check  |
| PLAT300_ALERT_4_G Atom Site Occupancy of H22C Constrained at       | 0.5   | Check  |
| PLAT300_ALERT_4_G Atom Site Occupancy of H22D Constrained at       | 0.5   | Check  |
| PLAT301_ALERT_3_G Main Residue Disorder .....(Resd 1 )             | 3%    | Note   |
| PLAT395_ALERT_2_G Deviating X-O-Y Angle From 120 for O2            | 112.3 | Degree |
| PLAT395_ALERT_2_G Deviating X-O-Y Angle From 120 for O3            | 109.6 | Degree |
| PLAT605_ALERT_4_G Largest Solvent Accessible VOID in the Structure | 269   | A**3   |
| PLAT860_ALERT_3_G Number of Least-Squares Restraints .....         | 35    | Note   |

0 **ALERT level A** = Most likely a serious problem - resolve or explain

1 **ALERT level B** = A potentially serious problem, consider carefully

14 **ALERT level C** = Check. Ensure it is not caused by an omission or oversight

29 **ALERT level G** = General information/check it is not something unexpected

2 ALERT type 1 CIF construction/syntax error, inconsistent or missing data  
18 ALERT type 2 Indicator that the structure model may be wrong or deficient  
4 ALERT type 3 Indicator that the structure quality may be low  
19 ALERT type 4 Improvement, methodology, query or suggestion  
1 ALERT type 5 Informative message, check

---

It is advisable to attempt to resolve as many as possible of the alerts in all categories. Often the minor alerts point to easily fixed oversights, errors and omissions in your CIF or refinement strategy, so attention to these fine details can be worthwhile. In order to resolve some of the more serious problems it may be necessary to carry out additional measurements or structure refinements. However, the purpose of your study may justify the reported deviations and the more serious of these should normally be commented upon in the discussion or experimental section of a paper or in the "special\_details" fields of the CIF. checkCIF was carefully designed to identify outliers and unusual parameters, but every test has its limitations and alerts that are not important in a particular case may appear. Conversely, the absence of alerts does not guarantee there are no aspects of the results needing attention. It is up to the individual to critically assess their own results and, if necessary, seek expert advice.

### **Publication of your CIF in IUCr journals**

A basic structural check has been run on your CIF. These basic checks will be run on all CIFs submitted for publication in IUCr journals (*Acta Crystallographica*, *Journal of Applied Crystallography*, *Journal of Synchrotron Radiation*); however, if you intend to submit to *Acta Crystallographica Section C* or *E* or *IUCrData*, you should make sure that full publication checks are run on the final version of your CIF prior to submission.

### **Publication of your CIF in other journals**

Please refer to the *Notes for Authors* of the relevant journal for any special instructions relating to CIF submission.

---

**PLATON version of 30/01/2018; check.def file version of 30/01/2018**

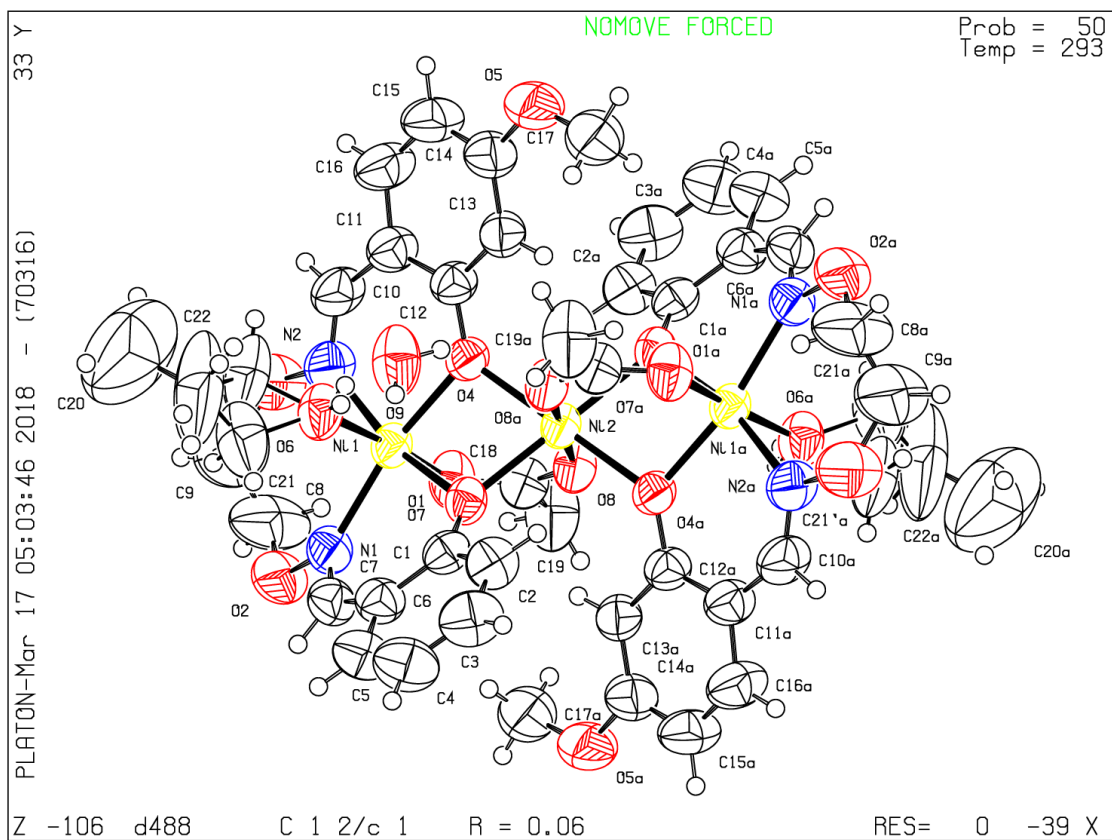

Supplement: s1 [file s1]
