# Supplementary material
Source: MDPI journal article supplement (https://www.mdpi.com/2073-4352/8/4/176)

# checkCIF/PLATON report

You have not supplied any structure factors. As a result the full set of tests cannot be run.

THIS REPORT IS FOR GUIDANCE ONLY. IF USED AS PART OF A REVIEW PROCEDURE FOR PUBLICATION, IT SHOULD NOT REPLACE THE EXPERTISE OF AN EXPERIENCED CRYSTALLOGRAPHIC REFEREE.

No syntax errors found.      CIF dictionary      Interpreting this report

## Datablock: d505

---

Bond precision:    C-C = 0.0085 A

Wavelength=0.71073

Cell:                a=11.1760(11)        b=11.952(1)        c=12.0854(14)  
                      alpha=68.606(9)    beta=66.295(10)    gamma=77.351(8)  
Temperature:        294 K

|                | Calculated                              | Reported                    |
|----------------|-----------------------------------------|-----------------------------|
| Volume         | 1371.3(3)                               | 1371.3(3)                   |
| Space group    | P -1                                    | P -1                        |
| Hall group     | -P 1                                    | -P 1                        |
| Moiety formula | C42 H48 N4 Ni3 O16, 2(H2 O) [+ solvent] | C42 H48 N4 Ni3 O16, 2(H2 O) |
| Sum formula    | C42 H52 N4 Ni3 O18 [+ solvent]          | C40 H46 N4 Ni3 O20          |
| Mr             | 1076.95                                 | 1078.94                     |
| Dx, g cm-3     | 1.304                                   | 1.307                       |
| Z              | 1                                       | 0                           |
| Mu (mm-1)      | 1.086                                   | 1.089                       |
| F000           | 560.0                                   | 558.0                       |
| F000'          | 561.28                                  |                             |
| h,k,lmax       | 13,14,14                                | 15,15,16                    |
| Nref           | 5399                                    | 5386                        |
| Tmin,Tmax      | 0.710,0.762                             | 0.747,1.000                 |
| Tmin'          | 0.691                                   |                             |

Correction method= # Reported T Limits: Tmin=0.747 Tmax=1.000  
AbsCorr = MULTI-SCAN

Data completeness= 0.998

Theta(max)= 26.020

R(reflections)= 0.0618( 3799)

wR2(reflections)= 0.1934( 5386)

S = 1.104

Npar= 313

---

The following ALERTS were generated. Each ALERT has the format

**test-name\_ALERT\_alert-type\_alert-level.**

Click on the hyperlinks for more details of the test.

### Alert level B

PLAT420\_ALERT\_2\_B D-H Without Acceptor 09 --H9A Please Check

### Alert level C

PLAT094\_ALERT\_2\_C Ratio of Maximum / Minimum Residual Density .... 2.40 Report  
 PLAT220\_ALERT\_2\_C Non-Solvent Resd 1 C Ueq(max)/Ueq(min) Range 3.5 Ratio  
 PLAT230\_ALERT\_2\_C Hirshfeld Test Diff for O2 --N1 . 6.0 s.u.  
 PLAT230\_ALERT\_2\_C Hirshfeld Test Diff for O3 --C9 . 5.4 s.u.  
 PLAT234\_ALERT\_4\_C Large Hirshfeld Difference C20 --C21 0.17 Ang.  
 PLAT241\_ALERT\_2\_C High 'MainMol' Ueq as Compared to Neighbors of O2 Check  
 PLAT241\_ALERT\_2\_C High 'MainMol' Ueq as Compared to Neighbors of C20 Check  
 PLAT242\_ALERT\_2\_C Low 'MainMol' Ueq as Compared to Neighbors of O6 Check  
 PLAT341\_ALERT\_3\_C Low Bond Precision on C-C Bonds ..... 0.00853 Ang.  
 PLAT360\_ALERT\_2\_C Short C(sp3)-C(sp3) Bond C20 - C21 . 1.42 Ang.  
 PLAT362\_ALERT\_2\_C Short C(sp3)-C(sp2) Bond C8 - C9 . 1.41 Ang.

### Alert level G

FORMU01\_ALERT\_1\_G There is a discrepancy between the atom counts in the  
 \_chemical\_formula\_sum and \_chemical\_formula\_moiety. This is  
 usually due to the moiety formula being in the wrong format.  
 Atom count from \_chemical\_formula\_sum: C40 H46 N4 Ni3 O20  
 Atom count from \_chemical\_formula\_moiety: C42 H52 N4 Ni3 O18  
 FORMU01\_ALERT\_2\_G There is a discrepancy between the atom counts in the  
 \_chemical\_formula\_sum and the formula from the \_atom\_site\* data.  
 Atom count from \_chemical\_formula\_sum: C40 H46 N4 Ni3 O20  
 Atom count from the \_atom\_site data: C42 H52 N4 Ni3 O18  
 CELLZ01\_ALERT\_1\_G Difference between formula and atom\_site contents detected.  
 CELLZ01\_ALERT\_1\_G ALERT: Large difference may be due to a  
 symmetry error - see SYMMG tests  
 From the CIF: \_cell\_formula\_units\_Z 1  
 From the CIF: \_chemical\_formula\_sum C40 H46 N4 Ni3 O20  
 TEST: Compare cell contents of formula and atom\_site data

| atom | Z*formula | cif sites | diff  |
|------|-----------|-----------|-------|
| C    | 40.00     | 42.00     | -2.00 |
| H    | 46.00     | 52.00     | -6.00 |
| N    | 4.00      | 4.00      | 0.00  |
| Ni   | 3.00      | 3.00      | 0.00  |
| O    | 20.00     | 18.00     | 2.00  |

PLAT002\_ALERT\_2\_G Number of Distance or Angle Restraints on AtSite 5 Note  
 PLAT003\_ALERT\_2\_G Number of Uiso or Uij Restrained non-H Atoms ... 2 Report  
 PLAT007\_ALERT\_5\_G Number of Unrefined Donor-H Atoms ..... 2 Report  
 PLAT041\_ALERT\_1\_G Calc. and Reported SumFormula Strings Differ Please Check  
 PLAT068\_ALERT\_1\_G Reported F000 Differs from Calcd (or Missing)... Please Check  
 PLAT072\_ALERT\_2\_G SHELXL First Parameter in WGHT Unusually Large 0.10 Report  
 PLAT172\_ALERT\_4\_G The CIF-Embedded .res File Contains DFIX Records 2 Report  
 PLAT173\_ALERT\_4\_G The CIF-Embedded .res File Contains DANG Records 2 Report  
 PLAT177\_ALERT\_4\_G The CIF-Embedded .res File Contains DELU Records 1 Report  
 PLAT395\_ALERT\_2\_G Deviating X-O-Y Angle From 120 for O2 110.3 Degree  
 PLAT395\_ALERT\_2\_G Deviating X-O-Y Angle From 120 for O3 110.4 Degree  
 PLAT605\_ALERT\_4\_G Largest Solvent Accessible VOID in the Structure 261 A\*\*3  
 PLAT860\_ALERT\_3\_G Number of Least-Squares Restraints ..... 5 Note  
 PLAT950\_ALERT\_5\_G Calculated (ThMax) and CIF-Reported Hmax Differ -2 Units  
 PLAT952\_ALERT\_5\_G Calculated (ThMax) and CIF-Reported Lmax Differ -2 Units

---

0 **ALERT level A** = Most likely a serious problem - resolve or explain  
1 **ALERT level B** = A potentially serious problem, consider carefully  
11 **ALERT level C** = Check. Ensure it is not caused by an omission or oversight  
19 **ALERT level G** = General information/check it is not something unexpected

5 ALERT type 1 CIF construction/syntax error, inconsistent or missing data  
16 ALERT type 2 Indicator that the structure model may be wrong or deficient  
2 ALERT type 3 Indicator that the structure quality may be low  
5 ALERT type 4 Improvement, methodology, query or suggestion  
3 ALERT type 5 Informative message, check

---

It is advisable to attempt to resolve as many as possible of the alerts in all categories. Often the minor alerts point to easily fixed oversights, errors and omissions in your CIF or refinement strategy, so attention to these fine details can be worthwhile. In order to resolve some of the more serious problems it may be necessary to carry out additional measurements or structure refinements. However, the purpose of your study may justify the reported deviations and the more serious of these should normally be commented upon in the discussion or experimental section of a paper or in the "special\_details" fields of the CIF. checkCIF was carefully designed to identify outliers and unusual parameters, but every test has its limitations and alerts that are not important in a particular case may appear. Conversely, the absence of alerts does not guarantee there are no aspects of the results needing attention. It is up to the individual to critically assess their own results and, if necessary, seek expert advice.

### **Publication of your CIF in IUCr journals**

A basic structural check has been run on your CIF. These basic checks will be run on all CIFs submitted for publication in IUCr journals (*Acta Crystallographica*, *Journal of Applied Crystallography*, *Journal of Synchrotron Radiation*); however, if you intend to submit to *Acta Crystallographica Section C* or *E* or *IUCrData*, you should make sure that full publication checks are run on the final version of your CIF prior to submission.

### **Publication of your CIF in other journals**

Please refer to the *Notes for Authors* of the relevant journal for any special instructions relating to CIF submission.

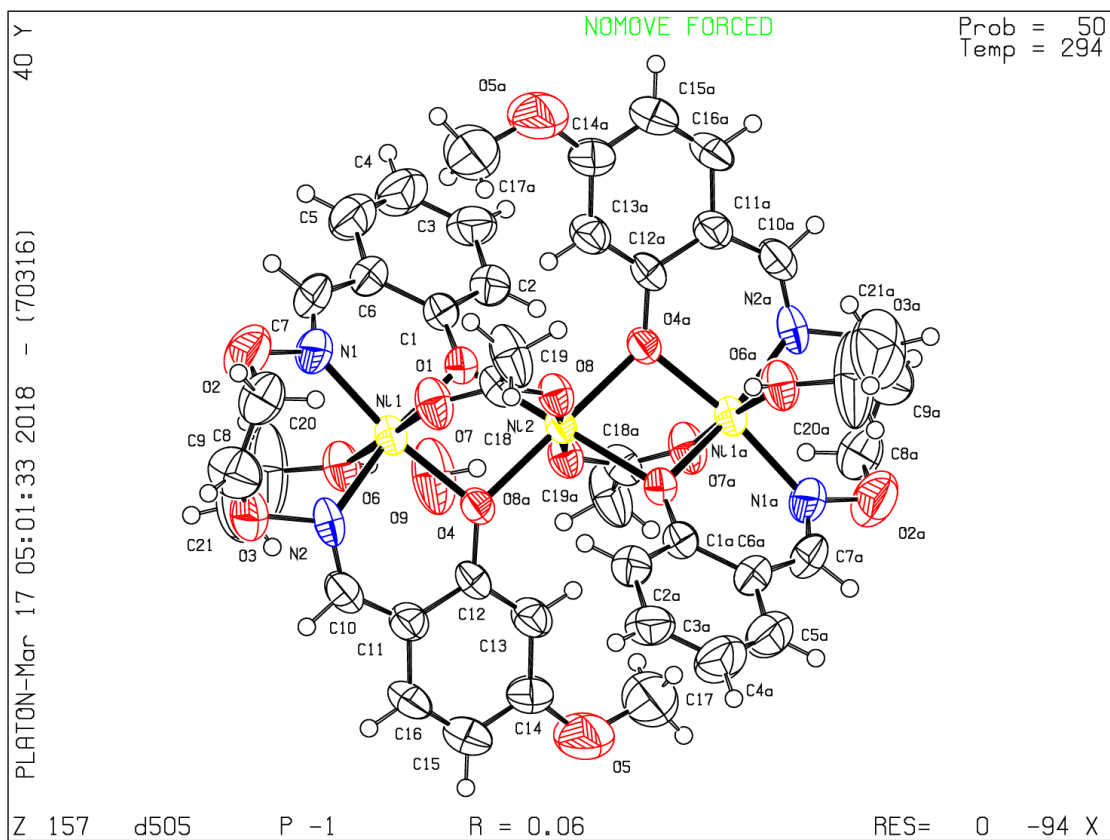

Supplement: s1 [file s1]
