# Supplementary material
Source: MDPI journal article supplement (https://www.mdpi.com/2073-4352/8/4/176)
Supplement: s1 [file s1]

# Solvent-Induced Unsymmetric Salamo-Like Trinuclear Ni<sup>II</sup> Complexes: Syntheses, Crystal Structures, Fluorescent and Magnetic Properties

Jing Li<sup>a</sup>, Hong-Jia Zhang<sup>a</sup>, Jian Chang<sup>a</sup>, Hao-Ran Jia<sup>a</sup>, Yin-Xia Sun<sup>a,\*</sup>, Yong-Qing Huang<sup>b</sup>

<sup>a</sup>School of Chemical and Biological Engineering, LanzhouJiaotongUniversity, Lanzhou730070, China

<sup>b</sup>State Key Laboratory of Mining Disaster Prevention and Control Co-founded by Shandong Province and the Ministry of Science and Technology, College of Chemical and Environmental Engineering, Shandong University of Science and Technology, Qingdao 266590, China

**Table S1** Crystal data and structure refinements for Ni<sup>II</sup> complexes **2**, **3** and **4**.

| Compound                                                                                 | <b>2</b>                                                                       | <b>3</b>                                                                       | <b>4</b>                                                                       |
|------------------------------------------------------------------------------------------|--------------------------------------------------------------------------------|--------------------------------------------------------------------------------|--------------------------------------------------------------------------------|
| Molecular formula                                                                        | C <sub>40</sub> H <sub>46</sub> Ni <sub>3</sub> N <sub>4</sub> O <sub>20</sub> | C <sub>44</sub> H <sub>58</sub> Ni <sub>3</sub> N <sub>4</sub> O <sub>18</sub> | C <sub>44</sub> H <sub>50</sub> Ni <sub>3</sub> N <sub>4</sub> O <sub>16</sub> |
| Molecular weight                                                                         | 1078.94                                                                        | 1107.07                                                                        | 1067.01                                                                        |
| Temperature (K)                                                                          | 294.29(10)                                                                     | 293(2)                                                                         | 294.29(10)                                                                     |
| Crystal size, mm <sup>3</sup>                                                            | 0.33×0.27×0.25                                                                 | 0.20×0.13×0.12                                                                 | 0.33×0.31×0.27                                                                 |
| Crystal system                                                                           | triclinic                                                                      | monoclinic                                                                     | monoclinic                                                                     |
| Space group                                                                              | <i>P</i> -1                                                                    | <i>C</i> 2/c                                                                   | <i>P</i> 2 <sub>1</sub> /n                                                     |
| <i>Unit cell dimensions</i>                                                              |                                                                                |                                                                                |                                                                                |
| <i>a</i> (Å)                                                                             | 11.1760(11)                                                                    | 19.2947(6)                                                                     | 12.3164(7)                                                                     |
| <i>b</i> (Å)                                                                             | 11.9520(10)                                                                    | 15.1426(6)                                                                     | 13.3441(6)                                                                     |
| <i>c</i> (Å)                                                                             | 12.0854(14)                                                                    | 20.4291(6)                                                                     | 15.2621(8)                                                                     |
| $\alpha$ (°)                                                                             | 68.606(9)                                                                      | 90                                                                             | 90                                                                             |
| $\beta$ (°)                                                                              | 66.295(10)                                                                     | 103.384(3)                                                                     | 111.426(7)                                                                     |
| $\gamma$ (°)                                                                             | 77.351(8)                                                                      | 90                                                                             | 90                                                                             |
| <i>V</i> (Å <sup>3</sup> )                                                               | 1371.3(3)                                                                      | 5806.7(3)                                                                      | 2335.0(2)                                                                      |
| <i>Z</i>                                                                                 | 1                                                                              | 4                                                                              | 2                                                                              |
| <i>D</i> <sub>calc</sub> (Mg/m <sup>3</sup> )                                            | 1.307                                                                          | 1.266                                                                          | 1.518                                                                          |
| $\mu$ (mm <sup>-1</sup> )                                                                | 1.089                                                                          | 1.683                                                                          | 1.272                                                                          |
| <i>F</i> (000)                                                                           | 558                                                                            | 2312                                                                           | 1108                                                                           |
| <i>hkl</i> range                                                                         | -14 ≤ <i>h</i> ≤ 15,<br>-12 ≤ <i>k</i> ≤ 15,<br>-16 ≤ <i>l</i> ≤ 16            | -19 ≤ <i>h</i> ≤ 23,<br>-18 ≤ <i>k</i> ≤ 15,<br>-21 ≤ <i>l</i> ≤ 24            | -15 ≤ <i>h</i> ≤ 15,<br>-15 ≤ <i>k</i> ≤ 16,<br>-13 ≤ <i>l</i> ≤ 18            |
| $\theta$ range(°)                                                                        | 3.3–26.0                                                                       | 3.8– 69.6                                                                      | 3.4–26.0                                                                       |
| Reflections collected / unique                                                           | 10747/5386                                                                     | 11733 / 5377                                                                   | 10245/ 4595                                                                    |
| <i>R</i> <sub>int</sub>                                                                  | 0.0306                                                                         | 0.0227                                                                         | 0.0423                                                                         |
| Data / restraints / parameters                                                           | 5386/5/313                                                                     | 5377 /35/338                                                                   | 4595/0/ 308                                                                    |
| <i>R</i> <sub>1</sub> / <i>wR</i> <sub>2</sub> [ <i>I</i> ≥ 2σ( <i>I</i> )] <sup>a</sup> | 0.0618 /0.1752                                                                 | 0.0557 / 0.1646                                                                | 0.0607 / 0.1396                                                                |
| <i>R</i> <sub>1</sub> / <i>wR</i> <sub>2</sub> (all data)                                | 0.0843/0.1934                                                                  | 0.0692 /0.1768                                                                 | 0.0996 /0.1662                                                                 |

\* Corresponding authors. E-mail address: [sun\\_yinxia@163.com](mailto:sun_yinxia@163.com) (Y.-X. Sun).

|                                                 |              |              |              |
|-------------------------------------------------|--------------|--------------|--------------|
| Goodness of fit (GOF)                           | 1.104        | 1.090        | 1.037        |
| $\Delta\rho_{\max,\min}$ (e $\text{\AA}^{-3}$ ) | 1.12 / -0.47 | 1.04 / -0.40 | 0.63 / -0.34 |

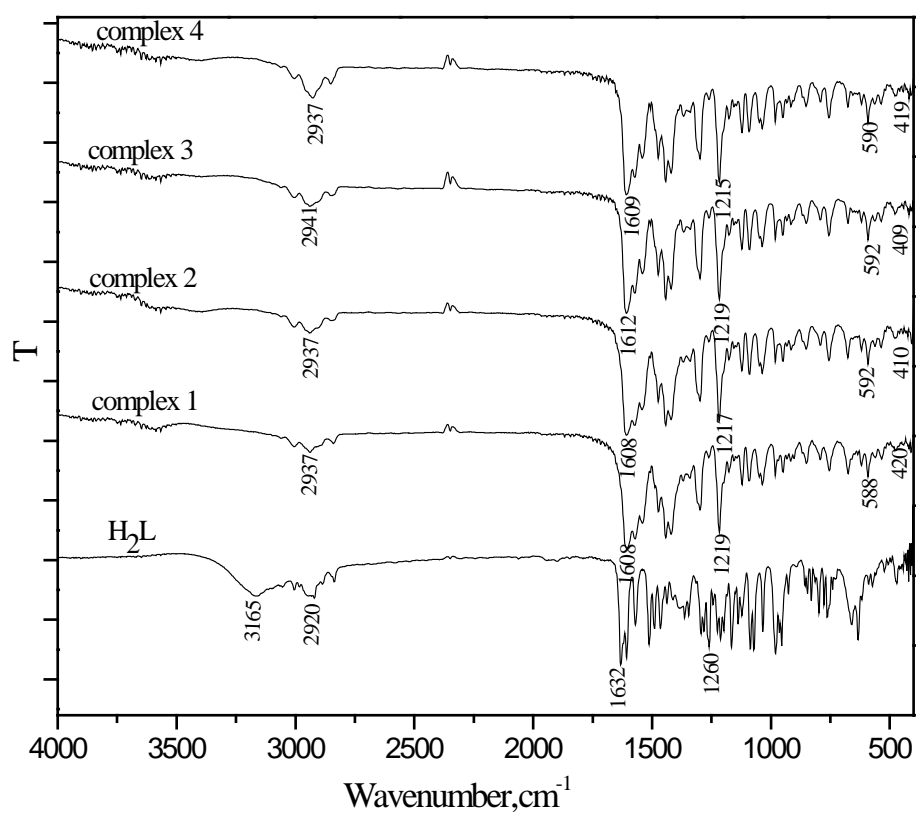

**Fig. S1** The IR spectra of  $H_2L$  and its corresponding  $Ni^{II}$  complexes **1**, **2**, **3** and **4**.
